# Supplementary material
Source: PubMed Central journal article supplement (PMC3320956)
Supplement: supp_M111.327023_jbc.M111.327023-1.pdf [file supp_M111.327023_jbc.M111.327023-1.pdf]

# Supplemental Table S1

Table S1. Relative expression of endogenous N-CoR, SMRT and HDAC3 proteins in different cell types (normalized to the expression level of LNCaP cells)

| HDAC3 | N-CoR | SMRT | Cell Line       |
|-------|-------|------|-----------------|
| 1.00  | 1.00  | 1.00 | LNCaP           |
| 1.71  | 1.86  | 1.41 | MDA-MB-231      |
| 2.44  | 3.48  | 3.04 | MCF7            |
| 4.26  | 3.15  | 2.98 | SW480           |
| 2.41  | 0.17  | 2.16 | Kasumi-1        |
| 2.88  | 2.22  | 0.98 | 293T            |
| 4.95  | 2.66  | 2.87 | HeLa            |
| 3.87  | 2.34  | 2.34 | HeLa-FLAG-N-CoR |
